# Supplementary material for: Cigarette butt-derived carbons have ultra-high surface area and unprecedented hydrogen storage capacity
Source: Royal Society of Chemistry journal article supplement (doi:10.1039/c7ee02616a), 2017-01-01
Supplement: c7ee02616a1.pdf [file c7ee02616a1.pdf]

## *Supporting Information*

### **Cigarette butt-derived carbons have ultra-high surface area and unprecedented hydrogen storage capacity**

*L. Scott Blankenship and Robert Mokaya\**

University of Nottingham, University Park, Nottingham NG7 2RD, U. K.

E-mail: r.mokaya@nottingham.ac.uk

## Appendix 1

### Excess and total hydrogen uptake

Our measurements provided the excess hydrogen uptake, which is the amount of hydrogen adsorbed in the carbons above that which would have been stored in the pores under similar conditions (temperature and pressure) assuming that there is zero energy of interaction between the hydrogen and the carbon pore walls. The total uptake is calculated from the excess storage by taking into account the amount of hydrogen compressed into the carbon pore volume space. Our gravimetric methods measured the excess hydrogen uptake ( $\theta_{Exc}$ ) from which the total storage ( $\theta_T$ ) was calculated from the equation:

$$\theta_T = \theta_{Exc} + \frac{100 \times d_{H_2} \times V_T}{(1 + d_{H_2} \times V_T)}$$

Where;

$\theta_T$  = total hydrogen uptake (wt%)

$\theta_{Exc}$  = excess hydrogen uptake (wt%)

$d_{H_2}$  = density (g cm<sup>-3</sup>) of compressed hydrogen gas at the relevant temperature and pressure. The density was obtained from the National Institute of Standards and Technology (NIST) website (<http://www.nist.gov/>)

$V_T$  = Pore volume (cm<sup>3</sup> g<sup>-1</sup>) of the carbon from nitrogen or CO<sub>2</sub> sorption analysis

**Table S1.** Elemental analysis of hydrochar derived from fresh (FF-hydrochar) and smoked (SF-hydrochar) cigarette filters, and activated carbons derived from the hydrochars.

| Sample       | C [%] | H [%] | N [%] | O [%] | (O/C) <sup>a</sup> | (H/C) <sup>a</sup> |
|--------------|-------|-------|-------|-------|--------------------|--------------------|
| FF-hydrochar | 63.6  | 4.2   | 0     | 32.2  | 0.380              | 0.793              |
| SF-hydrochar | 68.5  | 5.7   | 1.0   | 24.8  | 0.272              | 1.000              |
| CA-hydrochar | 66.2  | 3.9   | 0     | 29.9  | 0.339              | 0.707              |

<sup>a</sup>Atomic ratio

**Table S2.** Textural properties and H<sub>2</sub> uptake of O-rich (16.4 wt%) activated carbon (SF-4800) derived from cigarette butts compared to cellulose-derived activated carbon (C-4700) with lower O content (7.1 wt%).

| Sample  | Surface area <sup>a</sup><br>(m <sup>2</sup> g <sup>-1</sup> ) | Pore volume <sup>b</sup><br>(cm <sup>3</sup> g <sup>-1</sup> ) | H <sub>2</sub> uptake <sup>c</sup> (wt%) |                     | Reference |
|---------|----------------------------------------------------------------|----------------------------------------------------------------|------------------------------------------|---------------------|-----------|
|         |                                                                |                                                                | 1 bar                                    | 20 bar <sup>d</sup> |           |
| SF-4800 | 2393 (1810)                                                    | 1.09 (0.70)                                                    | 3.0                                      | 6.6 (5.9)           | This work |
| C-4700  | 2370 (2201)                                                    | 1.08 (0.96)                                                    | 2.5                                      | 5.6 (4.9)           | 1         |

Values in the parenthesis refer to: <sup>a</sup>micropore surface area and <sup>b</sup>micropore volume. <sup>c</sup>Gravimetric (wt%) H<sub>2</sub> uptake at -196 °C and various pressures (i.e., 1 or 20 bar). <sup>d</sup>The values in parenthesis are excess H<sub>2</sub> uptake.

### Reference

1. M. Sevilla, A. B. Fuertes and R. Mokaya R. *Energy Environ. Sci.*, 2011, **3**, 1400.

**Table S3.** Surface area, pore volume hydrogen storage capacity (at -196 °C and 20 or 30 bar) for cigarette filter (FF-4800) or cigarette butt (SF-4600) derived carbons compared to the best benchmark metal organic frameworks (MOFs).

| Sample   | Surface area (m <sup>2</sup> g <sup>-1</sup> ) | Pore Volume (cm <sup>3</sup> g <sup>-1</sup> ) | Gravimetric (wt%) H <sub>2</sub> uptake |       |          |       | Reference |
|----------|------------------------------------------------|------------------------------------------------|-----------------------------------------|-------|----------|-------|-----------|
|          |                                                |                                                | @ 20 bar                                |       | @ 30 bar |       |           |
|          |                                                |                                                | Excess                                  | Total | Excess   | Total |           |
| SF-4600  | 4310                                           | 2.09                                           | 8.1                                     | 9.4   | 8.3      | 10.4  | This work |
| FF-4800  | 4113                                           | 1.87                                           | 7.0                                     | 8.2   | 7.2      | 9.1   | This work |
| NOTT-112 | 3800                                           | 1.62                                           | 6.8                                     | 7.8   | 7.0      | 8.6   | 1         |
| NU-100   | 6143                                           | 2.82                                           | 6.9                                     | 8.5   | 7.8      | 10.0  | 2         |
| MOF-210  | 6240                                           | 3.60                                           | 6.4                                     | 8.4   | 7.3      | 10.2  | 3         |

## References

1. Y. Yan, X. Lin, S. Yang, A. J. Blake, A. Dailly, N. R. Champness, P. Hubberstey and M. Schroder, *Chem. Commun.* 2009, 1025–1027.
2. O. K. Farha, A. O. Yazaydin, I. Eryazici, C. D. Malliakas, B. G. Hauser, M. G. Kanatzidis, S. T. Nguyen, R. Q. Snurr and J. T. Hupp, *Nat. Chem.* 2010, **2**, 944–948.
3. H. Furukawa, N. Ko, Y. B. Go, N. Aratani, S. B. Choi, E. Choi, A. Ö. Yazaydin, R. Q. Snurr, M. O’Keeffe, J. Kim and O. M. Yaghi, *Science* 2010, **329**, 424–428.

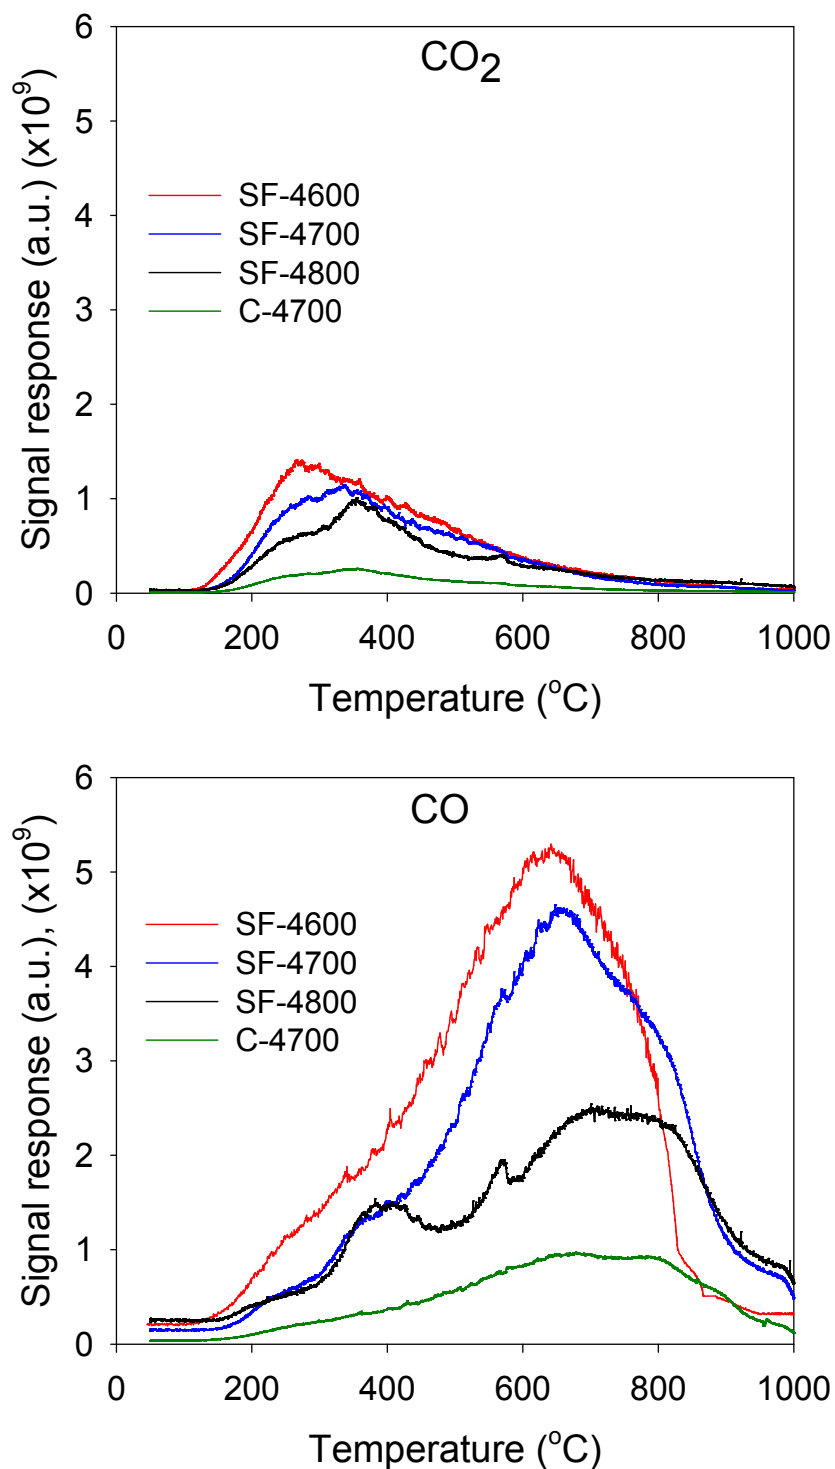

**Figure S1.** Evolution of CO<sub>2</sub> (top) and CO (bottom) under TPD conditions for activated carbons derived from smoked cigarette butts (SF-xT) compared to an activated carbon derived from cellulose (C-4700). SF-xT have O content of 16 – 31 wt%, and C-4700 has O content of 7.1 wt%.

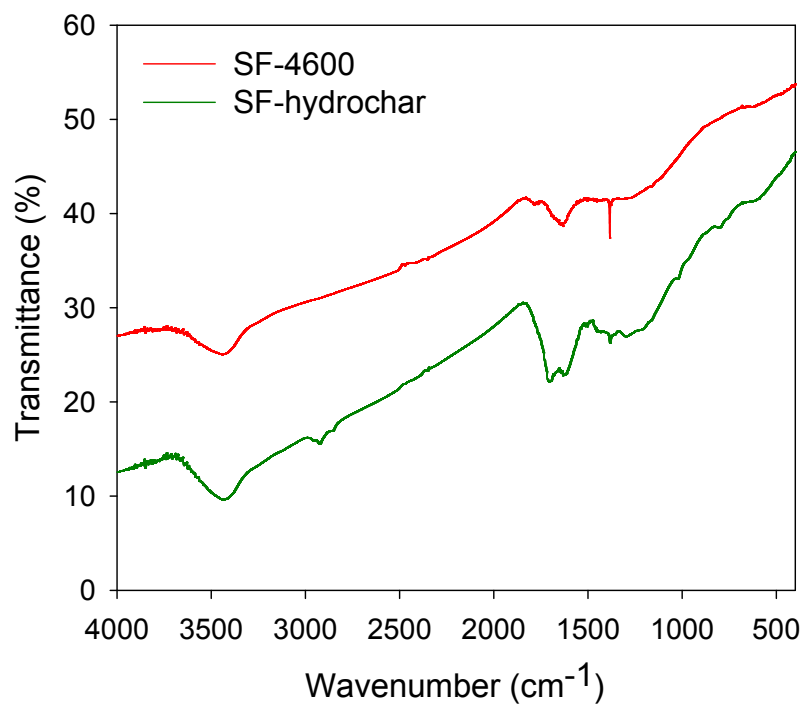

**Figure S2.** IR spectra of SF-hydrochar derived from smoked cigarette butts, and an activated carbon, SF-4600, prepared from the SF-hydrochar.

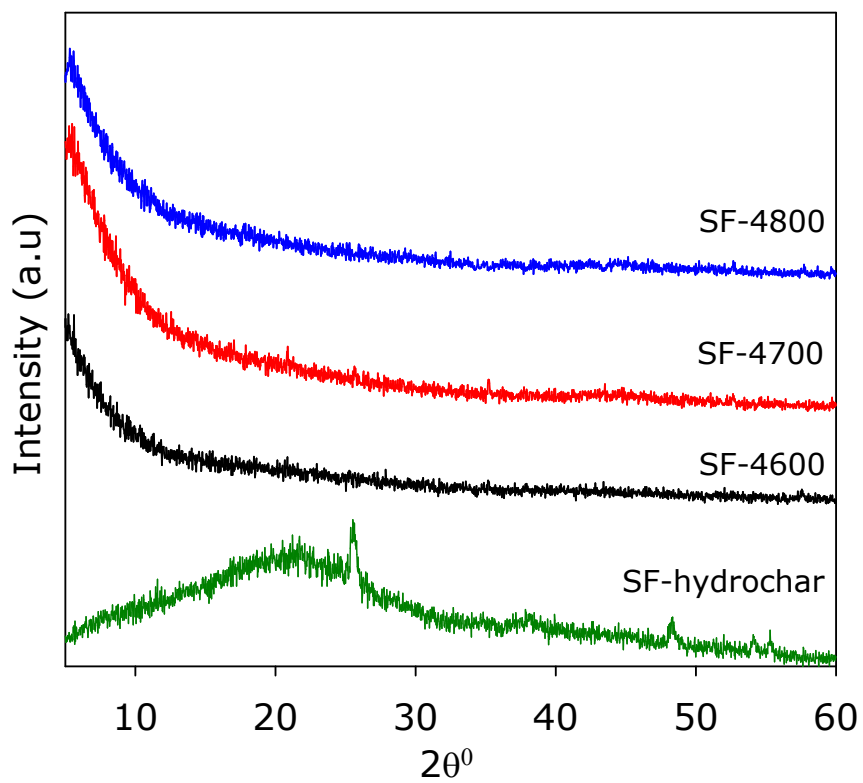

**Figure S3.** Powder XRD patterns of SF-hydrochar and SF-xT activated carbons prepared from SF-hydrochar.



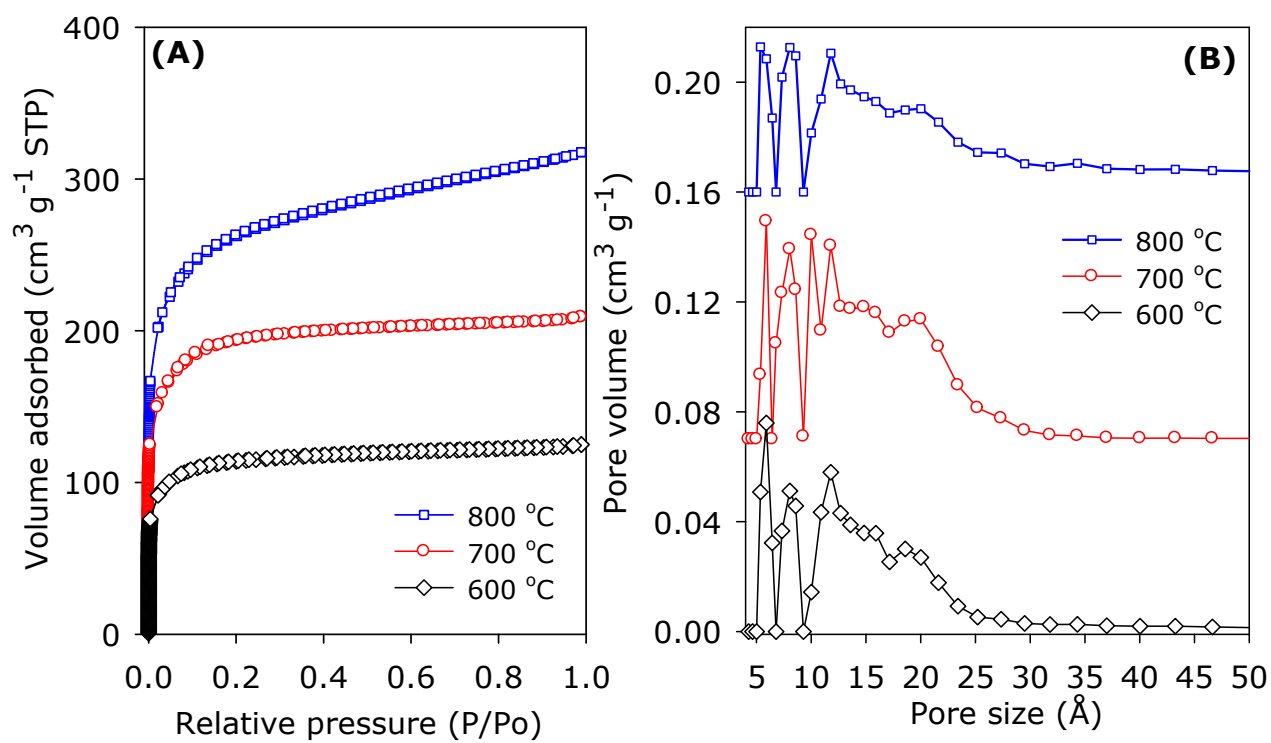

**Figure S4.** (A) Nitrogen sorption isotherms and (B) pore size distribution curves of carbon generated by heating the SF-hydrochar at various temperatures (600, 700 or 800 °C) for 1 h in the absence of KOH.

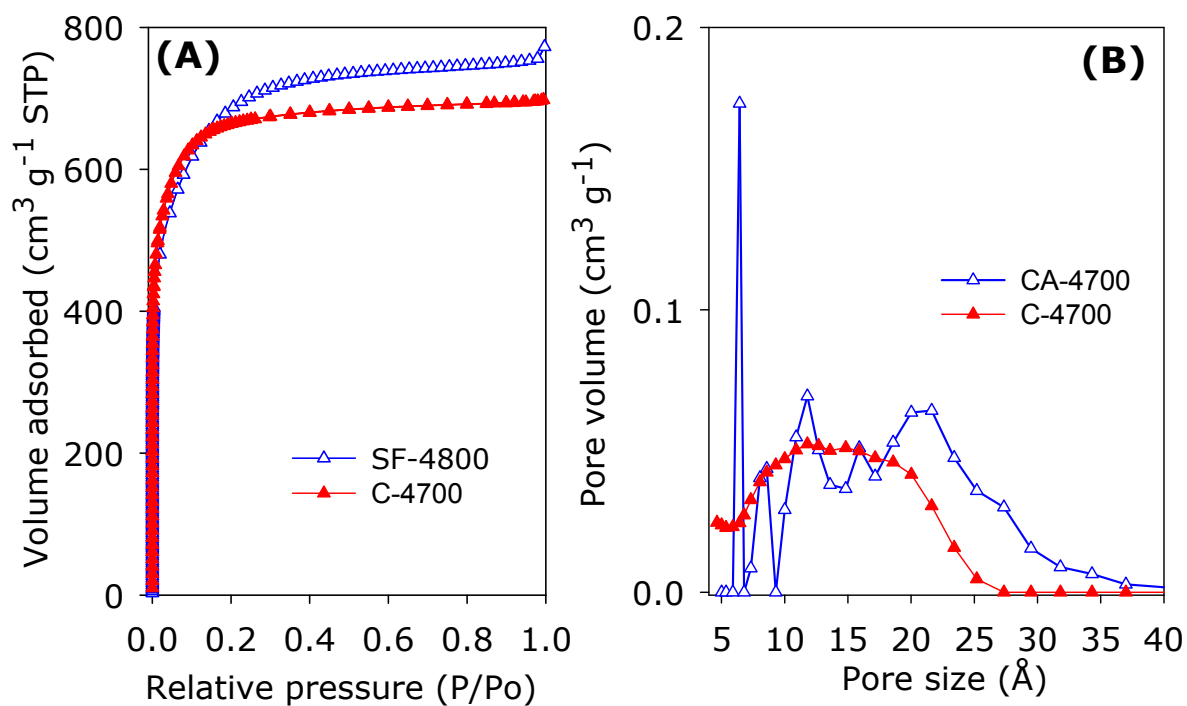

**Figure S5.** (A) Nitrogen sorption isotherms and (B) pore size distribution curves of carbon generated from cigarette butts (SF-4800) cellulose (C-4700).

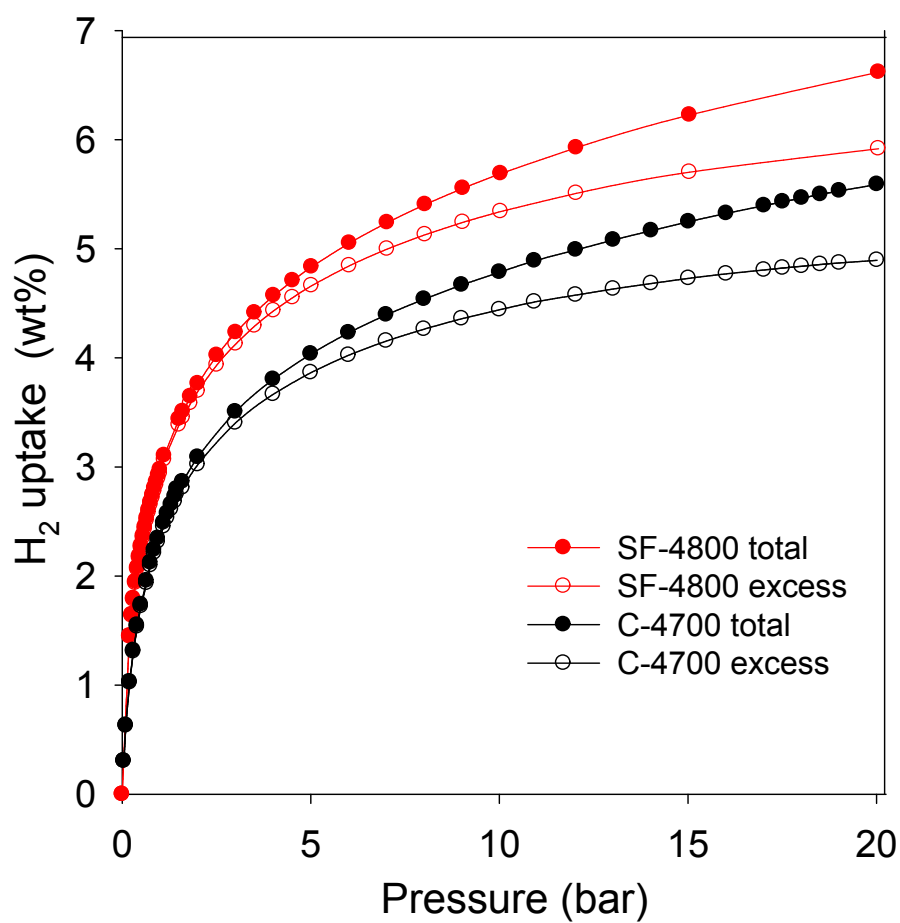

**Figure S6.** Excess and total hydrogen uptake at  $-196\text{ }^{\circ}\text{C}$  of activated carbon derived from smoked cigarette filters/butts (SF-4800) and pure cellulose (C-4700). The samples have similar porosity (Figure S5) but SF-4800 has higher oxygen content.
